# Supplementary material for: Heads or Tails: Genotyping of Hepatitis C Virus Concerning the 2k/1b Circulating Recombinant Form
Source: Int J Mol Sci. 2016 Aug 23;17(9):1384. doi: 10.3390/ijms17091384 (PMC5037664; doi:10.3390/ijms17091384)
Supplement: Supplementary file 1 [file ijms-17-01384-s001.xlsx]

## Sheet: Inno-LiPa vs NS5B results
First batch
				First analysis		Second analysis		Extraction and Third analysis
	Order number	Code	Genotype UZ Inno-LiPa	NS5B Seq AZ Sint Jan	NCBI Blast result	NS5B Seq AZ Sint Jan	NCBI Blast result	NS5B Seq AZ Sint Jan	NCBI Blast result	Vir. Load
1	110912325002		*2	2	0.94					5.19E+06 IU/mL
2	111020341502		*2b	2b	0.96
3	111126105905		*2	2	0.94					4.64E+05 IU/mL
4	120116054702		*2a of 2c	2a	0.94					1.04E+05 IU/mL
5	120308326502		*2a of 2c en 3a	3a	0.96					6.22E+06 IU/mL
6	120414208401		*2a of 2c	no sequence	-	1b (1b/2k 97%)	0.98			9.67E+04 IU/mL
7	120607326801		*2a/2c	2c	0.94					7.33E+06 IU/mL
8	120917232704		*2a of 2c	1b - 1b/2k	0.96					5.42E+06 IU/mL
9	120925305701		*2	2a	0.94					2.58E+06 IU/mL
10	121002281201		*2b	2b	0.95					2.44E+07 IU/mL
11	121008345401		*2 en 4	2	0.89					7.88E+04 IU/mL
12	130121317801		*2a of 2c	2k	0.93					7.78E+05 IU/mL
13	130313315201		*2	2	0.94					2.02E+06 IU/mL
14	130513335601		*2a of 2c	2a	0.95					2.41E+05 IU/mL
15	130528181505		*2a of 2c	1b	0.96					3.40E+05 IU/mL
16	130613316401		*2a of 2c	no sequence		no sequence		2	0.97	1.66E+05 IU/mL
17	130625257405		*2a of 2c	2a	0.91					3.71E+06 IU/mL
18	130814325702		*2	1b/2k - 1b	0.97					1.52E+06 IU/mL
19	131011262002		*2	2i	0.95					1.09E+05 IU/mL
20	131216287302		*2a of 2c	2i	0.94					9.77E+05 IU/mL
21	131220314203		*1b + 2 of 4?	1b - 1b/2k	0.95					3.15E+05 IU/mL
22	140424330602		*2	2k	0.91
23	140506051602		*2b	2b	0.96					2.91E+06 IU/mL
24	140821340202		*2a of 2c	1b - 1b/2k	0.97
25	140904339802		*2a of 2c	2c	0.94					7.97E+05 IU/mL
26	140926314102		*2b	2b	0.96					1.13E+05 IU/mL
27	141008325902		*2b	2b	0.95					5.35E+05 IU/mL
28	150212137804		*2	2a	0.94					2.06E+05 IU/mL
29	150219048001		*2a of 2c	2i	0.91					6.94E+06 IU/mL
Second batch
30	30317196101	V03-1135	*2a/2c	2c / 1b	96% - 95%					pos
31	30318238401	V03-1170	*2	2b	0.95					pos
32	30409165701	V03-1473	*2a/2c	2c	0.94					pos
33	30530189201	V03-2230	*2/niet typeerbaar@	2/2l	95% - 88%					4.6x10^5
34	30801123701	V03-3036	*2	2b	0.97					3.4x10^5 IU/mL
35	30903182301	V03-3501	*2a/2c	2a	0.98					pos
36	30915205401	V03-3664	*2a/2c	2q	0.93					9.0 x10^6 IU/mL
37	31103243101	V03-4398	*2	no sequence		no sequence		2	0.96	<6x10^4 IU/mL
38	31117226201	V03-4528	*2a/2c	2a	0.97					pos
39	31209222701	V03-4908	*2a/2c	no sequence		no sequence		no extra sample		<6x10^4 IU/mL
40	31223204201	V03-5081	*2	2b	0.96					pos
41	40211237301	V04-0587	*2a/2c	2a	0.95					3.1 x10^5 IU/mL
42	40217149208	V04-0628	*2a/2c	2c	0.92					5.9 x10^6 IU/mL
43	40409205401	V04-1477	*2b	2b	0.95					pos
44	40419236301	V04-1547	*2b	no sequence		no sequence		2	0.96	5.29*10^6 IU/mL
45	40419236401	V04-1548	*2b	2b	0.95					2.84*10^6 IU/mL
46	40527212901	V04-2112	*2	no sequence		no sequence		2	0.96	3.60*10^5 IU/mL
47	41026225001	V04-4180	*2a/2c	no sequence		no sequence		no extra sample		pos
48	50318218301	V05-1080	*2a/2c	no sequence		no sequence		no extra sample		<615 IU/mL
49	50405221201	V05-1285	*2a/2c	1b/2k	0.97					1.6x10^5 IU/mL
50	50420227001	V05-1532	*2	2a	0.95					1.0x10^5 IU/mL
51	50426214301	V05-1591	*2a/2c	2a	0.88					pos
52	50519161307	V05-1885	*2a/2c	2a	0.97					6.3x10^5 IU/mL
53	50520147301	V05-1907	*2a/2c	2c	0.93					9384 IU/mL
54	50923243501	V05-3502	*2	2c	0.94					1.3x10^6 IU/mL
55	60124279601	V06-0351	*2	1b/2k	0.95					3.04*10^6 IU/mL
56	60207288601	V06-0550	*2a/2c	2a	0.98					9.68*10^4 IU/mL
57	60414276201	V06-1622	*2b	2q	0.94					pos
58	60623132707	V06-2516	*2a/2c	2	0.91					4.4x10^4 IU/mL
59	61019272001	V06-4130	*2a/2c	2c	0.94					pos
60	61024100907	V06-4166	*1/2b	1a - 1a/2a	0.95					6.0x10^5 IU/mL
61	61122298401	V06-4699	*2b	2b	0.96					4.3x10^6 IU/mL
62	61120315401	V06-4724	*2b	2b	0.95					pos
63	61221282101	V06-5162	*2a/2c	no sequence		2a	0.96			5.6x10^4 IU/mL
64	70704249305	V07-2903	*2a/2c	1b/2k	0.96					6.2*10^5 IU/mL
65	70721181501	V07-3203	*2a/2c	2	0.91					1.3x10^4 IU/mL
66	70907292101	V07-3871	*2	2b	0.95					1.22*10^7 IU/mL
67	71017105408	V07-4435	*2a/2c	2a	0.95					5.70*10^5 IU/mL
68	71109105808	V07-4767	*2	2c	0.93					3.39*10^6 IU/mL
69	71213309501	V07-5392	*2a/2c	2c	0.91					1.59*10^6 IU/mL
70	71213309701	V07-5394	*2a/2c	no sequence		2c	0.93			769 IU/mL
71	71227269701	V07-5523	*2a/2c	2c	0.94					3.42*10^6 IU/mL
72	80118316501	V08-0375	*1b/2	2c	0.95					4.61*10^5 IU/mL
73	80308190301	V08-1143	*2a/2c	2c	0.95					pos
74	80425145106	V08-1946	*2	2	0.94					1.62x10^6 IU/mL
75	80508110505	V08-2150	*2	2i	0.91					2.59x10^4 IU/mL
76	80711203201	V08-3274	*2a/2c	2c	0.96					pos
77	80918289101	V08-4437	*2	2d	0.85					7.1x10^5 IU/mL
78	80925280901	V08-4490	*2a/2c	2f	0.88					2.81*10^4 IU/mL
79	81002297701	V08-4696	*2b	2b	0.97					9.06x10^7 IU/mL
80	81219284901	V08-5991	*2a of 2c	2k	0.93					3.3x10^4 IU/mL
81	90119207806	V09-0324	*2a/2c	2f	0.86					pos
82	90316187801	V09-1319	*2	2	0.96					pos
83	90429312001	V09-2142	*2a/2c	2i	0.94					3.42x10^5 IU/mL
84	90514312801	V09-2379	*2a/2c	1b/2k	0.97					5.74x10^5 IU/mL
85	90728279701	V09-3574	*2a/2c	1b - 1b/2k	96% - 95%					1.6 x10^6 IU/mL
86	90814287801	V09-3894	*2a of 2c	2a	0.96					4.7x10^6 IU/mL
87	91019320101	V09-4950	*2a/2c	2k	0.89					2.47x10^6 IU/mL
88	91210298301	V09-5758	*2	2c	0.95					2.31 x10^6 IU/mL
89	100108116806	V10-0116	*2	2	0.95					7.39E+06 IU/mL
90	100629298102	V10-3105	*2a or 2c	2c	0.94					3.07E+06 IU/mL
91	100707152903	V10-3260	*2a or 2c	2k	0.94					1105 IU/mL
92	100806204102	V10-3831	*2a of 2c	1b/2k	0.96					8.60E+04 IU/mL
93	101008328702	V10-5004	*2a of 2c	no sequence		2a	0.94			1566 IU/mL
94	101208325702	V10-6172	*2a/2c	1b/2k - 1b/1a	96% - 96%					5.68E+05 IU/mL
95	101210255402	V10-6175	*2a/2c	2c	0.93					1.80E+06 IU/mL
Third batch
96	1			2c	0.94
97	2			2c	0.95
98	3			2a	0.97
99	4			no sequence				no extra sample
100	5			2a	0.96
101	6			2c	0.92
102	7			2a	0.96
103	8			2a	0.97
104	9			2a	0.96
105	10			2c	0.93
106	11			2c	0.95
107	12			2i	0.94
108	13			2a	0.96
109	14			2c	0.93
110	15			1b/2k	0.98
111	16			2c	0.94
112	17			2b	0.97
113	18			2q	0.93
114	19			2a	0.97
115	20			2c	0.95
116	21			no sequence		2c	0.99
	Colour legend	Inno-LiPa vs. NS5B Seq
		matching results
		discordant results
		discordant results with unmasking 2k/1b
		no sequence eventually with NS5B
